# Supplementary material for: Helping patients prepare their dependent children for parental death: mixed-methods evaluation of a codeveloped training programme for palliative and allied healthcare professionals in the UK
Source: HighWire-hosted journal article supplement (doi:10.1136/bmjopen-2023-081775), 2024-05-01
Supplement: bmjopen-2023-081775supp006_data_supplement.pdf [file bmjopen-2023-081775supp006_data_supplement.pdf]

## Supplemental Material 6.

### 'No Conversation Too Tough'

#### Before training interview questions

##### General questions about participant:

1. Firstly, can you tell me a bit about yourself?
  - What is your job role, and can you describe some of your day-to-day activities within this role?
2. Can you tell me a bit more about your training background, pre- and post-registration?
  - As you know, The RSF training programme focuses specifically on helping patients whose cancer cannot be cured to communicate with and support their dependent children. Were there any elements, broad or specific, within your previous training, pre- or post-registration, that you believe have positively influenced your ability to help patients in this sense?
  - And do you think there were any gaps in your training in relation to this? *[if so, what were these?]*

##### Questions about motivations, hopes and expectations in relation to RSF training programme:

3. How did you come to hear about this training programme and what were your initial thoughts regarding, for instance, the name 'No conversation too tough' and the training description provided by RSF?
4. What made you sign up for this training programme?
5. What are the most important things that you hope to get out of the training programme?  
Why is this important to you?
  - How do you expect the training to help you in supporting patients and their children?
  - Regarding this, are there any specific elements that you hope to see in the training, which will help you support patients? How do you think these may help you?
  - Is there anything else that you would like to add regarding your expectations in relation to the training programme?

##### Questions about experience:

6. Can you tell me a bit more about the kinds of patients you work with on a regular basis and to what extent you tend to be aware of these patients' family situations and/or have conversations with patients about their family situations? *[further probing based on response, e.g. How do you usually become aware of this? Is this through formal or informal conversation/volunteered by patient/asked/does it come up in holistic needs assessment? If participant mentions they do not regularly have these conversations, ask why they think this is]*
7. How often do you encounter patients whose cancer cannot be cured and who have dependent children in practice?

8. What are your experiences in relation to communicating with these patients about their children/discussing support for their children/communication with their children directly?  
*[further probing based on response]*
  - How do you feel about this? (in terms of, for instance, your confidence, skills and managing your own emotions)?
  - Can you think of any specific examples where you feel that you were able to support these patients and their children effectively? What made this effective, and how did you feel in this situation?
  - Can you think of any specific examples where you found supporting these patients and their children more challenging? What made it challenging, and how did you feel in this situation?
9. To what extent do you believe you can personally influence change in your workplace in general, and specifically when it comes to helping patients communicate with and support their children? *[further probing based on response, e.g. what do you see as constraints in relation to this?]*
10. In your workplace, do you receive any support for having conversations with these patients and their children? *[further probing based on response – If yes: What kind of support? Do you find this to be helpful? If no: why do you think no support is currently being offered? Do you think this will change in the future?]*
11. Because we are aware that personal context can be important for perspectives in relation to children's needs, may I ask if you have any children that you are a parent or guardian to or that you are in any other way responsible for? How old are they?
12. Does anything from your own life influence your response to these patients, and/or your approach to communicating with and supporting these patients and their children?
13. That's all my questions. Is there anything that we haven't covered and that you would like to share before we finish?
