# Supplementary material for: Helping patients prepare their dependent children for parental death: mixed-methods evaluation of a codeveloped training programme for palliative and allied healthcare professionals in the UK
Source: HighWire-hosted journal article supplement (doi:10.1136/bmjopen-2023-081775), 2024-05-01
Supplement: bmjopen-2023-081775supp008_data_supplement.pdf [file bmjopen-2023-081775supp008_data_supplement.pdf]

## Supplemental Material 8. Evaluation Sample Characteristics

|                                                        | Pre-Training |    | Post-Training |    | Pre-Training |    | Post-Training |    |
|--------------------------------------------------------|--------------|----|---------------|----|--------------|----|---------------|----|
|                                                        | N = 35       |    | N = 28        |    | N = 35       |    | N = 28        |    |
|                                                        | n            | %* | n             | %* | n            | %* | n             | %* |
| <b>Demographics:</b>                                   |              |    |               |    |              |    |               |    |
| <b>Gender Identity</b>                                 |              |    |               |    |              |    |               |    |
| Female                                                 | 31           | 89 | 25            | 89 | 4            | 11 | 4             | 14 |
| Male                                                   | 4            | 11 | 3             | 11 | 6            | 17 | 5             | 18 |
| Total <sup>b</sup>                                     | 35           |    | 28            |    | 5            | 14 | 4             | 14 |
| <b>Age Group</b>                                       |              |    |               |    | 20           | 57 | 15            | 54 |
| 18-24 years                                            | 1            | 3  | 1             | 3  | 35           |    | 35            |    |
| 25-34 years                                            | 7            | 20 | 7             | 25 |              |    |               |    |
| 35-44 years                                            | 8            | 23 | 5             | 18 |              |    |               |    |
| 45-54 years                                            | 11           | 31 | 8             | 29 |              |    |               |    |
| 55-64 years                                            | 8            | 23 | 7             | 25 |              |    |               |    |
| Total <sup>b</sup>                                     | 35           |    | 28            |    |              |    |               |    |
| <b>Ethnic/Cultural Background</b>                      |              |    |               |    |              |    |               |    |
| White British                                          | 24           | 69 | 19            | 68 |              |    |               |    |
| White Irish                                            | 1            | 3  | 1             | 4  |              |    |               |    |
| White Other                                            | 5            | 14 | 4             | 14 |              |    |               |    |
| Asian                                                  | 2            | 6  | 1             | 4  |              |    |               |    |
| Mixed background                                       | 1            | 3  | 1             | 4  |              |    |               |    |
| Black Caribbean/Black Caribbean British                | 1            | 3  | 1             | 4  |              |    |               |    |
| Black African or Black African British                 | 1            | 3  | 1             | 4  |              |    |               |    |
| Total <sup>b</sup>                                     | 35           |    | 28            |    |              |    |               |    |
| <b>Presence of Children</b>                            |              |    |               |    |              |    |               |    |
| Under 18 years                                         | 18           | 51 | 12            | 43 |              |    |               |    |
| All children over 18 years.                            | 9            | 26 | 8             | 29 |              |    |               |    |
| No children                                            | 8            | 23 | 8             | 29 |              |    |               |    |
| Total <sup>b</sup>                                     | 35           |    | 28            |    |              |    |               |    |
| <b>Professional Status:</b>                            |              |    |               |    |              |    |               |    |
| <b>Registration Year</b>                               |              |    |               |    |              |    |               |    |
| 1980-1989                                              | 6            | 17 | 5             | 18 |              |    |               |    |
| 1990-1999                                              | 9            | 26 | 6             | 21 |              |    |               |    |
| 2000-2009                                              | 9            | 26 | 6             | 21 |              |    |               |    |
| 2010-2020                                              | 11           | 31 | 11            | 39 |              |    |               |    |
| Total <sup>b</sup>                                     | 35           |    | 28            |    |              |    |               |    |
| <b>Time in current specialism</b>                      |              |    |               |    |              |    |               |    |
| Less than a year                                       |              |    |               |    | 4            | 11 | 4             | 14 |
| 1-2 years                                              |              |    |               |    | 6            | 17 | 5             | 18 |
| 3-4 years                                              |              |    |               |    | 5            | 14 | 4             | 14 |
| 5 or more years                                        |              |    |               |    | 20           | 57 | 15            | 54 |
| Total <sup>b</sup>                                     |              |    |               |    | 35           |    | 35            |    |
| <b>Qualifications</b>                                  |              |    |               |    |              |    |               |    |
| Diploma                                                |              |    |               |    | 14           | 40 | 10            | 36 |
| Undergraduate Degree                                   |              |    |               |    | 24           | 69 | 20            | 71 |
| Master's Degree                                        |              |    |               |    | 8            | 23 | 7             | 25 |
| Post Registration Training specific to Palliative care |              |    |               |    | 16           | 46 | 15            | 53 |
| Totals exceed sample sizes                             |              |    |               |    |              |    |               |    |
| <b>Professional Roles:</b>                             |              |    |               |    |              |    |               |    |
| <b>Acute Care Clinical Nurse Specialists</b>           |              |    |               |    | 16           | 46 | 11            | 39 |
| Breast Cancer n =                                      |              |    |               |    | 5            |    | 5             |    |
| Haematology                                            |              |    |               |    | 2            |    | 1             |    |
| Lung Cancer                                            |              |    |               |    | 2            |    | 1             |    |
| Colorectal                                             |              |    |               |    | 1            |    | 1             |    |
| Gynaecology Oncology                                   |              |    |               |    | 1            |    | 1             |    |
| Myeloma and Plasma Oncology                            |              |    |               |    | 1            |    | 1             |    |
| Oesophageal/Gastroenterology                           |              |    |               |    | 1            |    | 1             |    |
| Neuro-Oncology                                         |              |    |               |    | 1            |    | 1             |    |
| Sarcoma                                                |              |    |               |    | 1            |    | 1             |    |
| <b>Palliative Care</b>                                 |              |    |               |    | 14           | 40 | 12            | 43 |
| Hospital Palliative Care Nurse                         |              |    |               |    | 8            |    | 7             |    |
| Hospice Community Care Nurse                           |              |    |               |    | 3            |    | 2             |    |
| NHS Trust Community Palliative Care Nurse              |              |    |               |    | 1            |    | 1             |    |
| Clinical Practice Educator for Palliative Care         |              |    |               |    | 1            |    | 1             |    |
| Hospital Palliative Care Social Worker                 |              |    |               |    | 1            |    | 1             |    |
| <b>Cancer Support</b>                                  |              |    |               |    | 4            | 11 | 4             | 14 |
| Support/Information Specialist                         |              |    |               |    | 3            |    | 3             |    |
| Support Services Manager                               |              |    |               |    | 1            |    | 1             |    |
| <b>Lead Research Nurse</b>                             |              |    |               |    | 1            | 3  | 1             | 4  |
| Total <sup>b</sup>                                     |              |    |               |    | 35           |    | 28            |    |

<sup>a</sup> Percentages rounded.

<sup>b</sup> Some totals exceed 100% due to rounding.

Seven participants were lost to quantitative post-training assessment, two of whom were also lost to qualitative post-training interviews. Reasons given were, lack of time due to busy practice, issues with staffing levels, and personal reasons (leave, illness).
